# Supplementary material
Source: Springer Nature journal article supplement (https://www.springermedizin.de/resource/supplementary/12936_2013_3044_MOESM9_ESM.pdf/9544940)

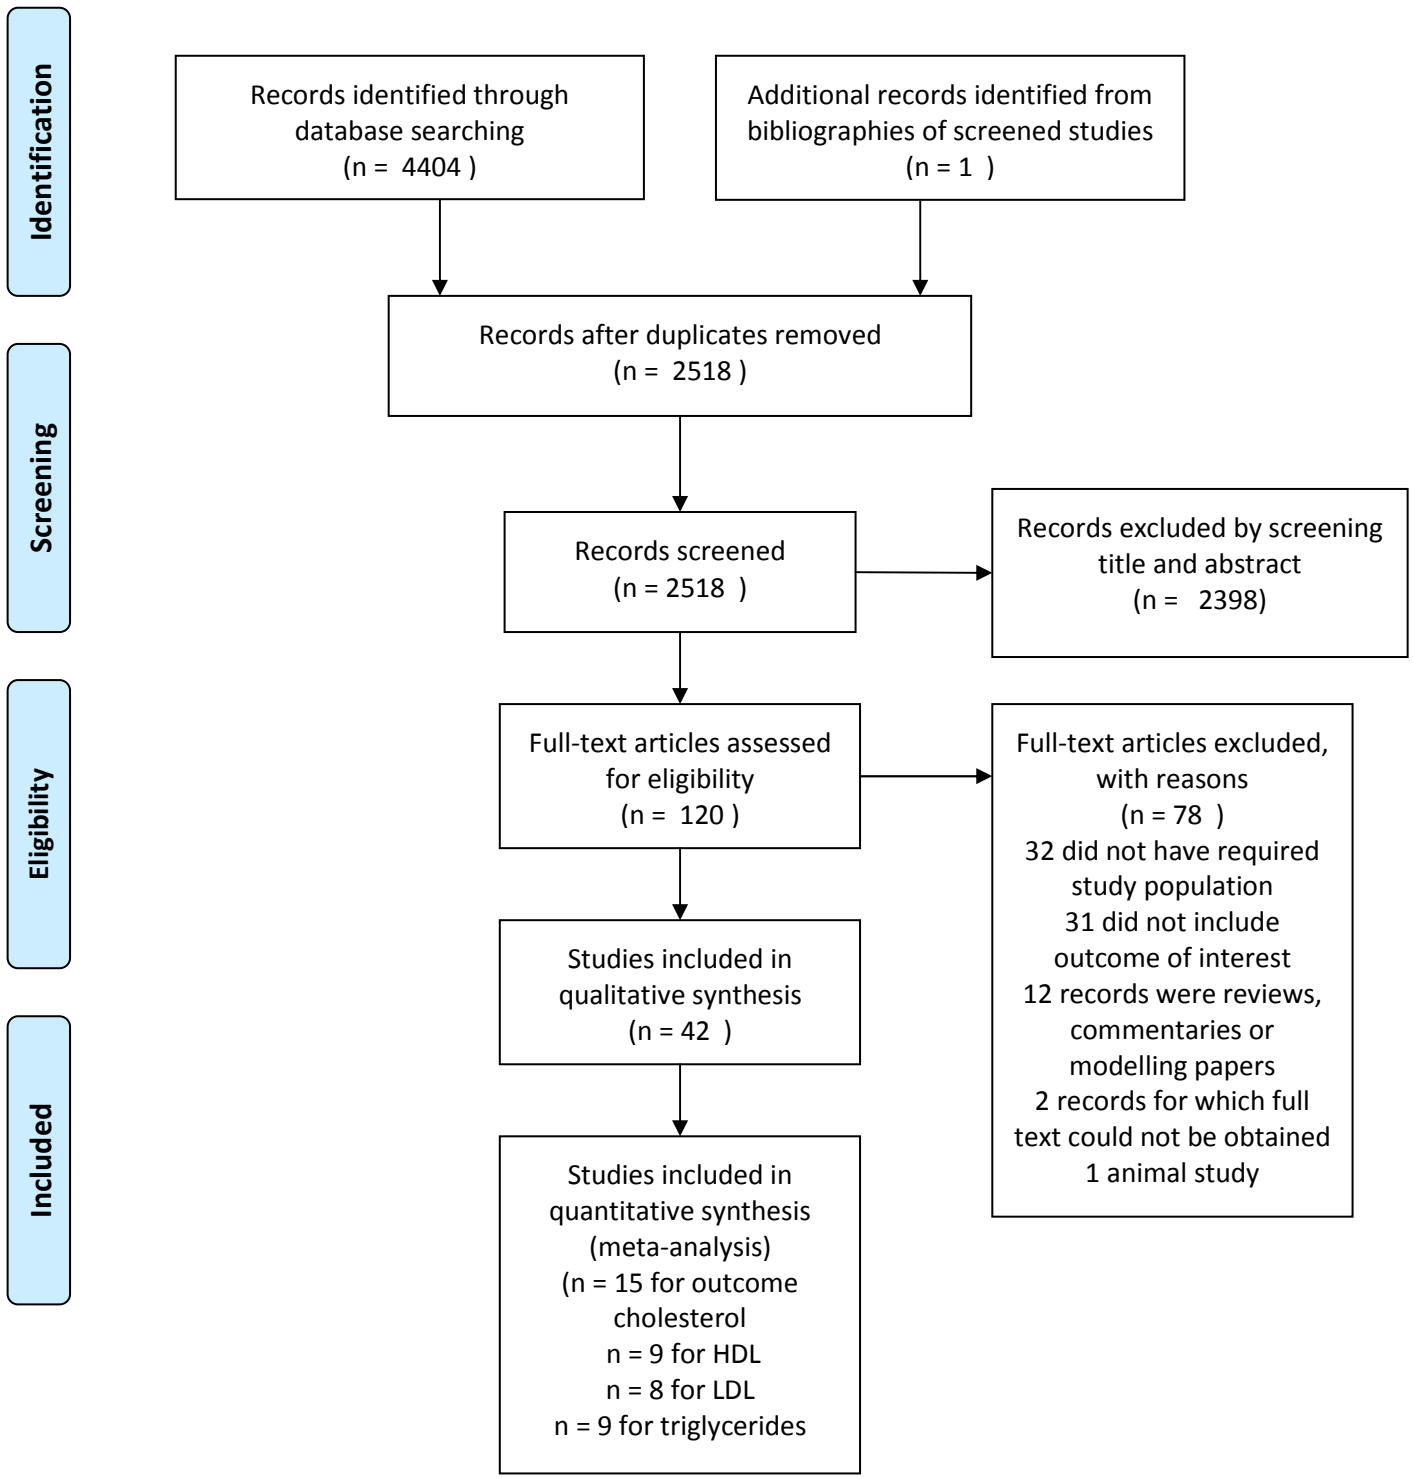

Supplement: MOESM9 [file 9544940]
